# Supplementary material for: Bayesian Inference of Species Networks from Multilocus Sequence Data
Source: PubMed Central journal article supplement — Mol Biol Evol. 2017 Dec 6;35(2):504–17. doi: 10.1093/molbev/msx307 (PMC5850812; doi:10.1093/molbev/msx307), 2017-12-06
Supplement: msx307_speciesnetwork_suppl.pdf [file msx307_speciesnetwork_suppl.pdf]

# Bayesian Inference of Species Networks from Multilocus Sequence Data

Supplemental Material

Chi Zhang<sup>1,2,\*</sup>, Huw A. Ogilvie<sup>3,4</sup>, Alexei J. Drummond<sup>4,5</sup>, Tanja Stadler<sup>1,2,\*</sup>

November 10, 2017

<sup>1</sup>*Department of Biosystems Science and Engineering, Eidgenössische Technische Hochschule Zürich, 4058 Basel, Switzerland*

<sup>2</sup>*Swiss Institute of Bioinformatics (SIB), Switzerland*

<sup>3</sup>*Division of Ecology and Evolution, Research School of Biology, Australian National University, Canberra, Australia*

<sup>4</sup>*Centre for Computational Evolution, University of Auckland, Auckland, New Zealand*

<sup>5</sup>*Department of Computer Science, University of Auckland, Auckland, New Zealand*

*\* Corresponding author: E-mail: [chi.zhang@bsse.ethz.ch](mailto:chi.zhang@bsse.ethz.ch) or [tanja.stadler@bsse.ethz.ch](mailto:tanja.stadler@bsse.ethz.ch)*

Table 1: Posterior estimates (medians and 95% HPD intervals) of inheritance probability ( $\gamma$ ), node heights ( $\tau$ 's), and population sizes ( $\theta$ 's) for the truncated dataset 1, when the species network topology was fixed to the one in Figure 8. Three different priors were used for the population sizes: inverse-gamma(3,0.0003) with mean 0.00015 (small), inverse-gamma(3,0.003) with mean 0.0015 (medium), and inverse-gamma(3,0.03) with mean 0.015 (large). The population sizes were either inferred using MCMC or integrated out analytically.

|                                 | Posterior (median & 95% HPD) |                            |                            |
|---------------------------------|------------------------------|----------------------------|----------------------------|
|                                 | inverse-gamma(3, 0.0003)     | inverse-gamma(3, 0.003)    | inverse-gamma(3, 0.03)     |
| Population sizes inferred       |                              |                            |                            |
| $\gamma$                        | 0.408 (0.199, 0.623)         | 0.317 (0.152, 0.506)       | 0.309 (0.102, 0.579)       |
| $\tau_R$                        | 0.0013 (0.00098, 0.0016)     | 0.0014 (0.0010, 0.0017)    | 0.0013 (0.0010, 0.0016)    |
| $\tau_D$                        | 0.00031 (0.00024, 0.00039)   | 0.00017 (0.00009, 0.00029) | 0.00039 (0.00019, 0.00054) |
| $\tau_E$                        | 0.00034 (0.00026, 0.00042)   | 0.00039 (0.00018, 0.00057) | 0.00057 (0.00041, 0.00074) |
| $\tau_H$                        | 0.00030 (0.00023, 0.00038)   | 0.00007 (0.00000, 0.00019) | 0.00027 (0.00003, 0.00047) |
| $\theta_W$                      | 0.0010 (0.00070, 0.0015)     | 0.0012 (0.00061, 0.0018)   | 0.0020 (0.0014, 0.0027)    |
| $\theta_P$                      | 0.0057 (0.0031, 0.0099)      | 0.0033 (0.00035, 0.0083)   | 0.0056 (0.0027, 0.016)     |
| $\theta_L$                      | 0.00080 (0.00051, 0.0012)    | 0.00064 (0.00035, 0.0011)  | 0.0017 (0.0012, 0.0026)    |
| $\theta_R$                      | 0.0012 (0.00073, 0.0018)     | 0.0012 (0.00075, 0.0018)   | 0.0020 (0.0014, 0.0026)    |
| $\theta_D$                      | 0.0026 (0.00099, 0.0054)     | 0.0027 (0.0013, 0.0057)    | 0.0028 (0.0015, 0.0052)    |
| $\theta_E$                      | 0.0042 (0.0016, 0.0079)      | 0.0045 (0.0021, 0.0085)    | 0.0052 (0.0025, 0.0099)    |
| $\theta_{DH_1}$                 | 0.00015 (0.00003, 0.00060)   | 0.0014 (0.00029, 0.0050)   | 0.010 (0.0024, 0.035)      |
| $\theta_{EH_1}$                 | 0.00019 (0.00004, 0.00065)   | 0.0022 (0.00036, 0.0050)   | 0.0056 (0.0023, 0.021)     |
| Population sizes integrated out |                              |                            |                            |
| $\gamma$                        | 0.362 (0.152, 0.595)         | 0.331 (0.175, 0.516)       | 0.319 (0.158, 0.551)       |
| $\tau_R$                        | 0.0012 (0.00091, 0.0015)     | 0.0014 (0.00098, 0.0018)   | 0.0013 (0.0010, 0.0017)    |
| $\tau_D$                        | 0.00032 (0.00025, 0.00041)   | 0.00020 (0.00010, 0.00030) | 0.00038 (0.00025, 0.00053) |
| $\tau_E$                        | 0.00033 (0.00026, 0.00043)   | 0.00039 (0.00017, 0.00065) | 0.00055 (0.00038, 0.00072) |
| $\tau_H$                        | 0.00031 (0.00024, 0.00040)   | 0.00010 (0.00000, 0.00024) | 0.00027 (0.00003, 0.00047) |

Table 2: Posterior estimates (medians and 95% HPD intervals) of inheritance probability ( $\gamma$ ), node heights ( $\tau$ 's), and population sizes ( $\theta$ 's) for the truncated dataset 2. See legend to Table S1.

|                                 | Posterior (median & 95% HPD) |                            |                            |
|---------------------------------|------------------------------|----------------------------|----------------------------|
|                                 | inverse-gamma(3, 0.0003)     | inverse-gamma(3, 0.003)    | inverse-gamma(3, 0.03)     |
| Population sizes inferred       |                              |                            |                            |
| $\gamma$                        | 0.477 (0.264, 0.710)         | 0.340 (0.154, 0.569)       | 0.344 (0.129, 0.694)       |
| $\tau_R$                        | 0.0011 (0.00080, 0.0014)     | 0.0013 (0.00094, 0.0015)   | 0.0012 (0.0009, 0.0015)    |
| $\tau_D$                        | 0.00027 (0.00019, 0.00036)   | 0.00014 (0.00004, 0.00025) | 0.00036 (0.00023, 0.00052) |
| $\tau_E$                        | 0.00030 (0.00021, 0.00039)   | 0.00039 (0.00023, 0.00056) | 0.00056 (0.00035, 0.00073) |
| $\tau_H$                        | 0.00027 (0.00019, 0.00035)   | 0.00008 (0.00000, 0.00021) | 0.00024 (0.00001, 0.00041) |
| $\theta_W$                      | 0.0011 (0.00071, 0.0017)     | 0.0015 (0.00092, 0.0022)   | 0.0022 (0.0015, 0.0029)    |
| $\theta_P$                      | 0.0061 (0.0030, 0.011)       | 0.0031 (0.00038, 0.0073)   | 0.0060 (0.0029, 0.014)     |
| $\theta_L$                      | 0.00080 (0.00046, 0.0012)    | 0.00064 (0.00028, 0.0011)  | 0.0017 (0.0012, 0.0023)    |
| $\theta_R$                      | 0.0013 (0.00074, 0.0020)     | 0.0012 (0.00068, 0.0021)   | 0.0020 (0.0014, 0.0026)    |
| $\theta_D$                      | 0.0039 (0.0016, 0.0071)      | 0.0035 (0.0021, 0.0057)    | 0.0036 (0.0019, 0.0062)    |
| $\theta_E$                      | 0.0040 (0.0014, 0.0081)      | 0.0044 (0.0016, 0.0083)    | 0.0052 (0.0026, 0.0099)    |
| $\theta_{DH_1}$                 | 0.00015 (0.00003, 0.00061)   | 0.0014 (0.00030, 0.0045)   | 0.011 (0.0027, 0.036)      |
| $\theta_{EH_1}$                 | 0.00016 (0.00003, 0.00061)   | 0.0022 (0.00045, 0.0049)   | 0.0061 (0.0021, 0.023)     |
| Population sizes integrated out |                              |                            |                            |
| $\gamma$                        | 0.460 (0.252, 0.703)         | 0.366 (0.167, 0.571)       | 0.364 (0.137, 0.678)       |
| $\tau_R$                        | 0.0011 (0.00086, 0.0014)     | 0.0013 (0.00095, 0.0015)   | 0.0012 (0.00089, 0.0015)   |
| $\tau_D$                        | 0.00029 (0.00021, 0.00037)   | 0.00015 (0.00009, 0.00026) | 0.00037 (0.00026, 0.00052) |
| $\tau_E$                        | 0.00031 (0.00021, 0.00041)   | 0.00037 (0.00023, 0.00054) | 0.00050 (0.00035, 0.00066) |
| $\tau_H$                        | 0.00028 (0.00020, 0.00037)   | 0.00007 (0.00000, 0.00021) | 0.00025 (0.00002, 0.00042) |
